# Supplementary material for: Access to indolines from primary phenylethylamines by an unexpected palladium-catalyzed C–H functionalization process
Source: Royal Society of Chemistry journal article supplement (doi:10.1039/c9ra05670j), 2019-01-01

# Access to indolines from primary phenylethylamines by an unexpected palladium-catalyzed C–H functionalization process

Andrea Mancinelli, <sup>a,c</sup> Joan Albert, <sup>b,c</sup> Xavier Ariza, <sup>\*a,c,e</sup> Leoní A. Barrios, <sup>b,d</sup> Jordi Garcia, <sup>a,c,e</sup> Roberto Gómez, <sup>a,c</sup> and Jaume Granell, <sup>\*b,c</sup>

<sup>a</sup>Departament de Química Inorgànica i Orgànica, Secció de Química Orgànica, Facultat de Química, Universitat de Barcelona, Martí i Franquès 1-11. 08028 Barcelona, Spain.

<sup>b</sup>Departament de Química Inorgànica i Orgànica, Secció de Química Inorgànica, Facultat de Química, Universitat de Barcelona, Martí i Franquès 1-11. 08028 Barcelona, Spain.

<sup>c</sup>Institut de Biomedicina (IBUB), Universitat de Barcelona, Barcelona, Spain

<sup>d</sup>Institute of Nanoscience and Nanotechnology (IN2UB), Universitat de Barcelona, Barcelona, Spain.

<sup>e</sup>CIBER Fisiopatología de la Obesidad y la Nutrición (CIBERObn), Instituto de Salud Carlos III, Madrid, Spain

## Table of contents

|                                                                                |   |
|--------------------------------------------------------------------------------|---|
| 1. <sup>1</sup> H and <sup>13</sup> C NMR spectrum of compound <b>2a</b> ..... | 2 |
| 2. <sup>1</sup> H and <sup>13</sup> C NMR spectrum of compound <b>2b</b> ..... | 3 |
| 3. <sup>1</sup> H and <sup>13</sup> C NMR spectrum of compound <b>2c</b> ..... | 4 |
| 4. <sup>1</sup> H and <sup>13</sup> C NMR spectrum of compound <b>2d</b> ..... | 5 |
| 5. <sup>1</sup> H and <sup>13</sup> C NMR spectrum of compound <b>2e</b> ..... | 6 |
| 6. <sup>1</sup> H and <sup>13</sup> C NMR spectrum of compound <b>2j</b> ..... | 7 |
| 7. <sup>1</sup> H and <sup>13</sup> C NMR spectrum of compound <b>2k</b> ..... | 8 |
| 8. <sup>1</sup> H and <sup>13</sup> C NMR spectrum of compound <b>2l</b> ..... | 9 |

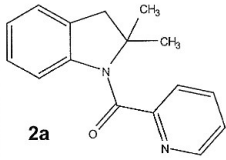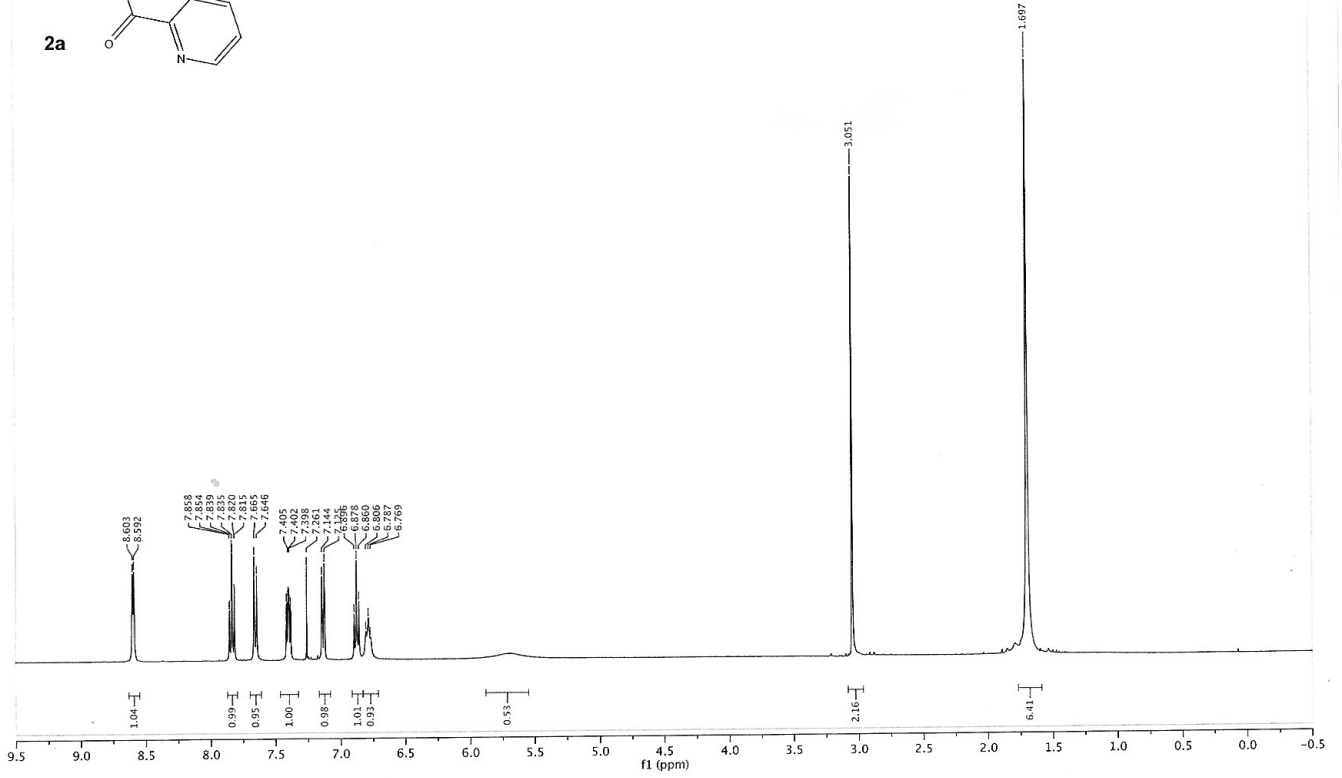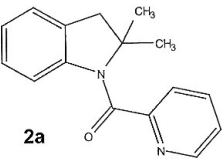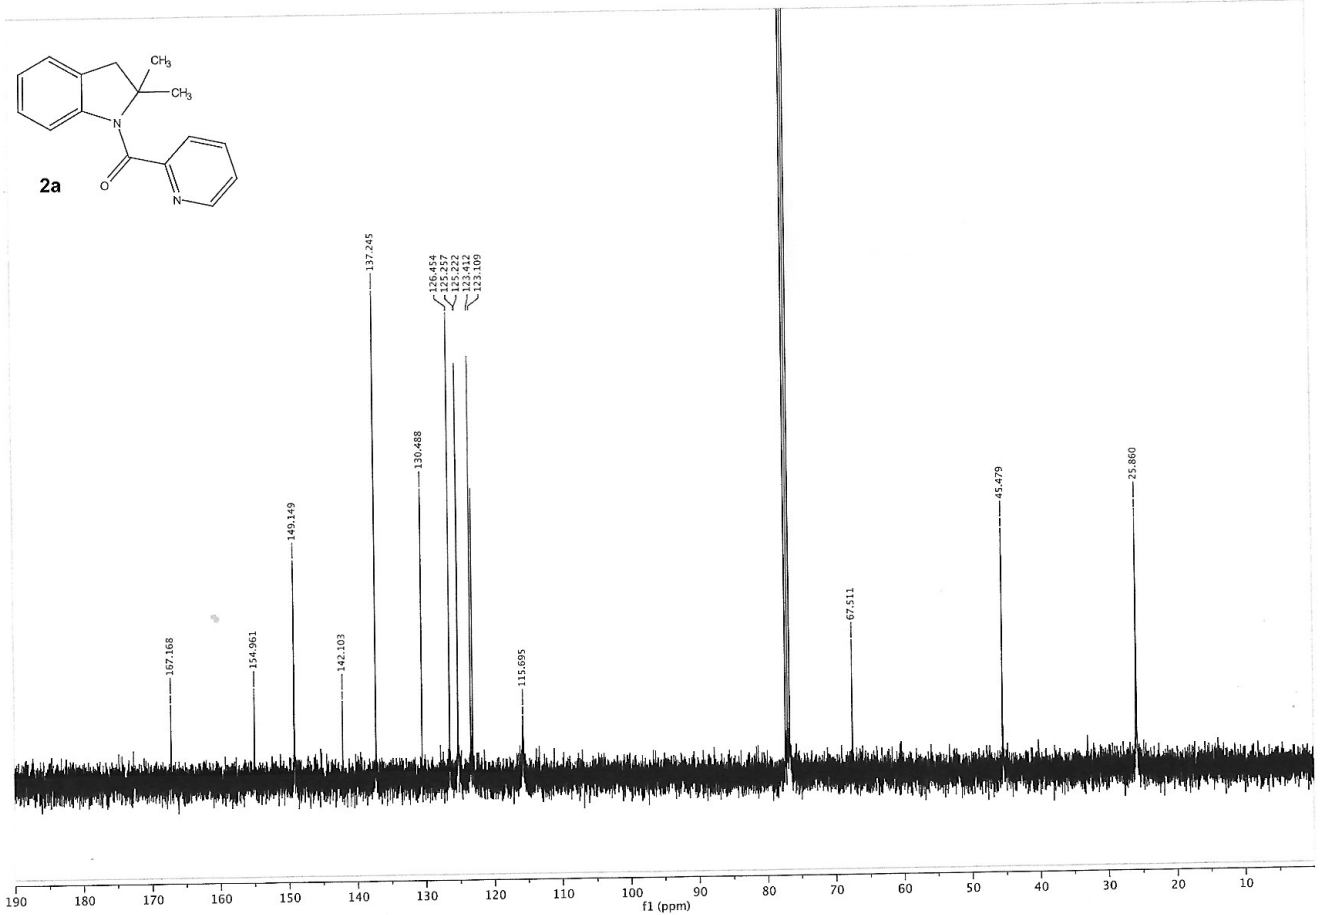

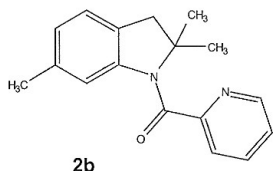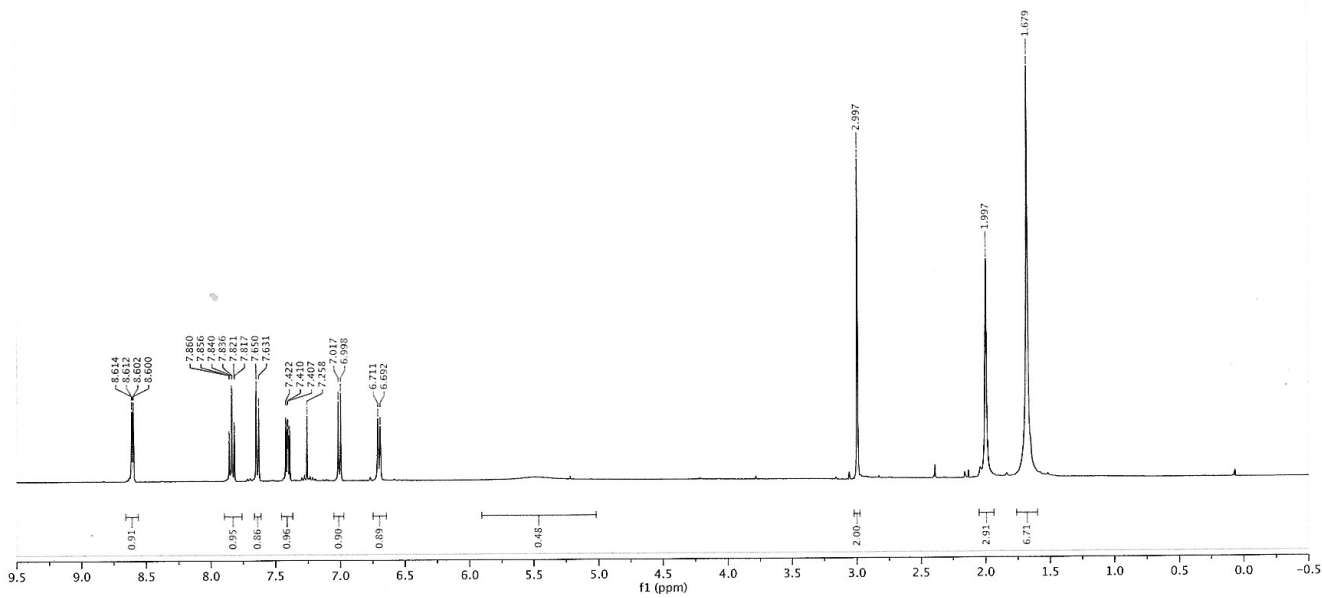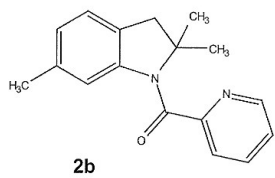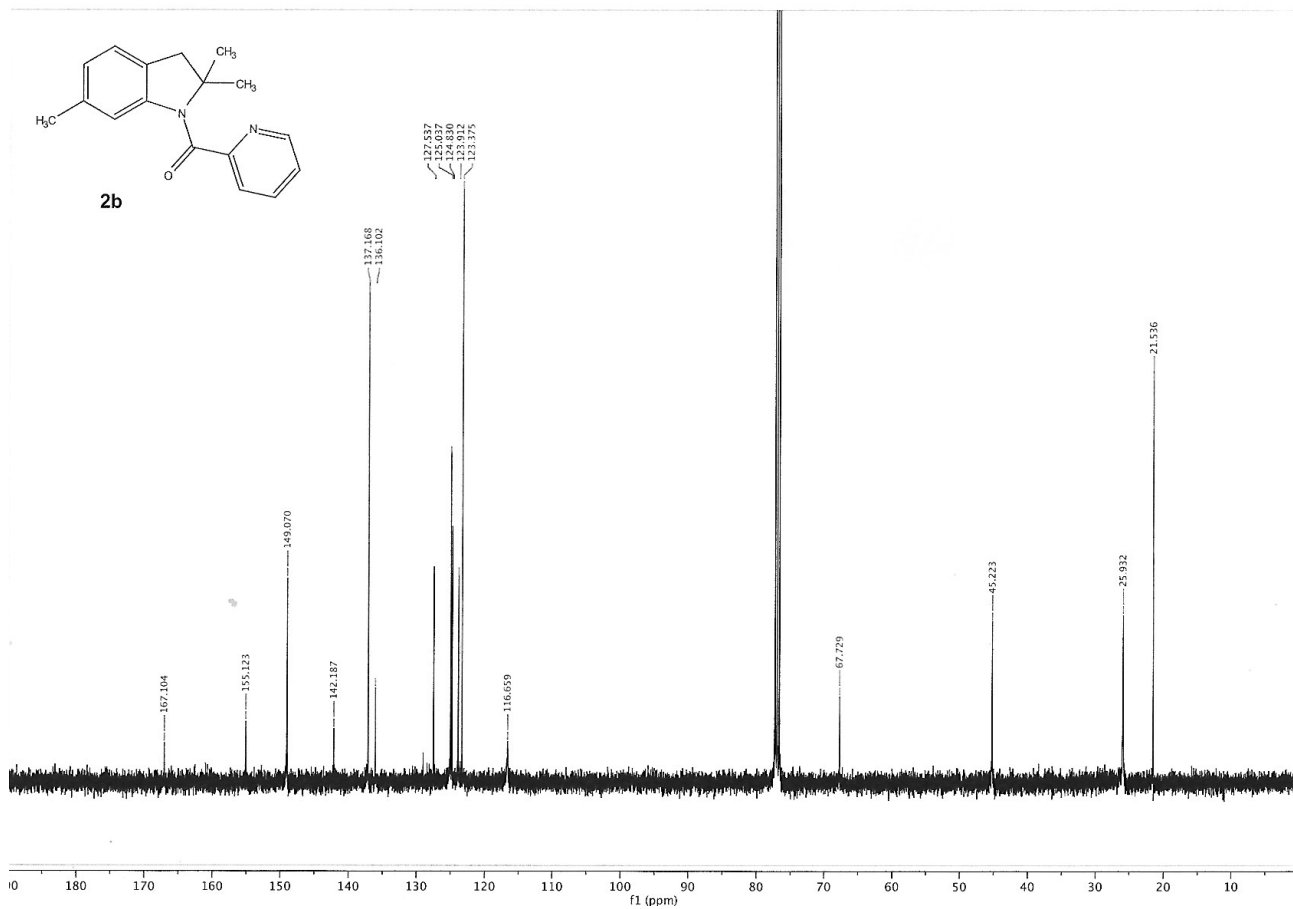

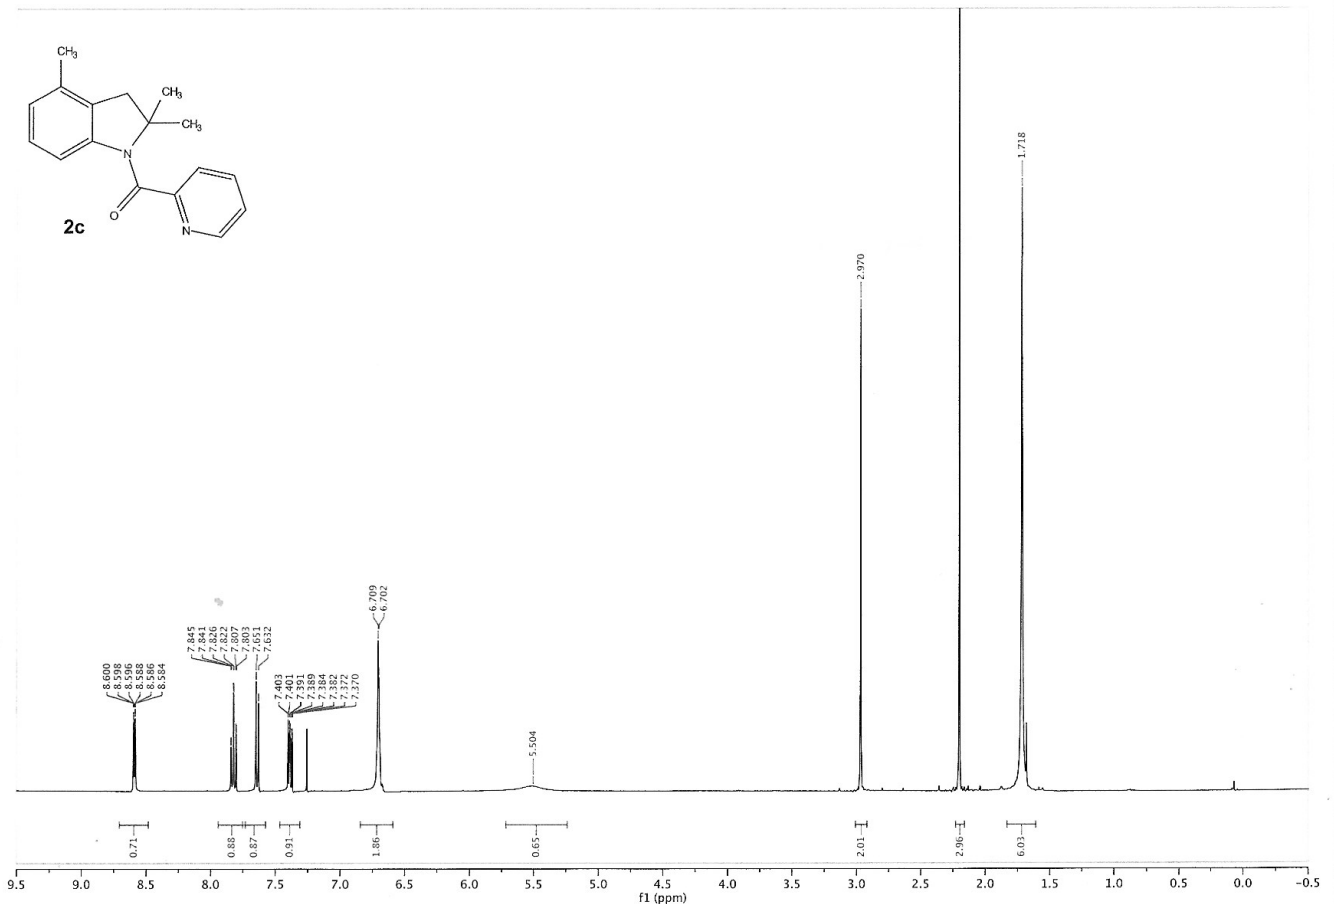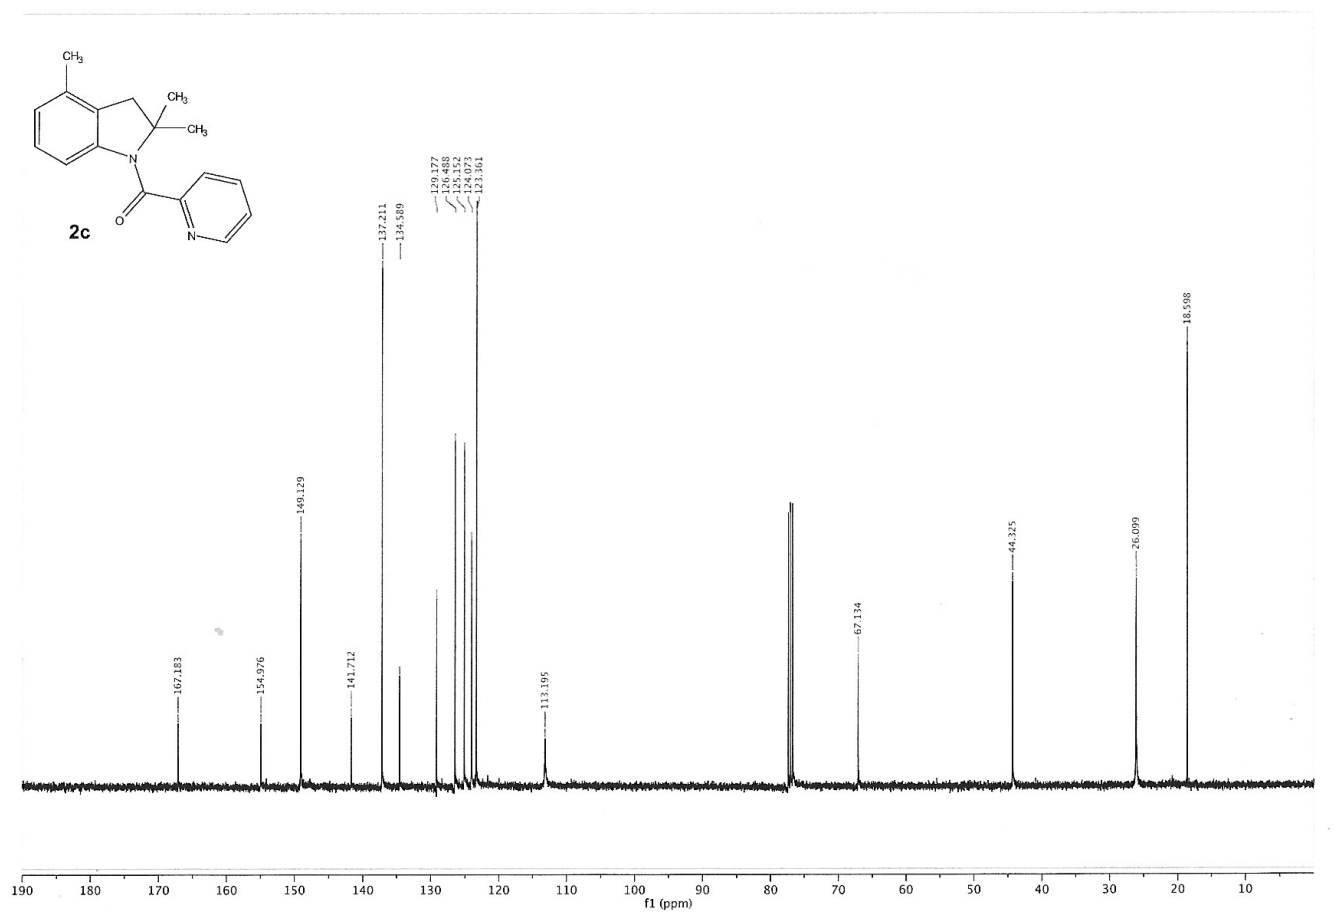

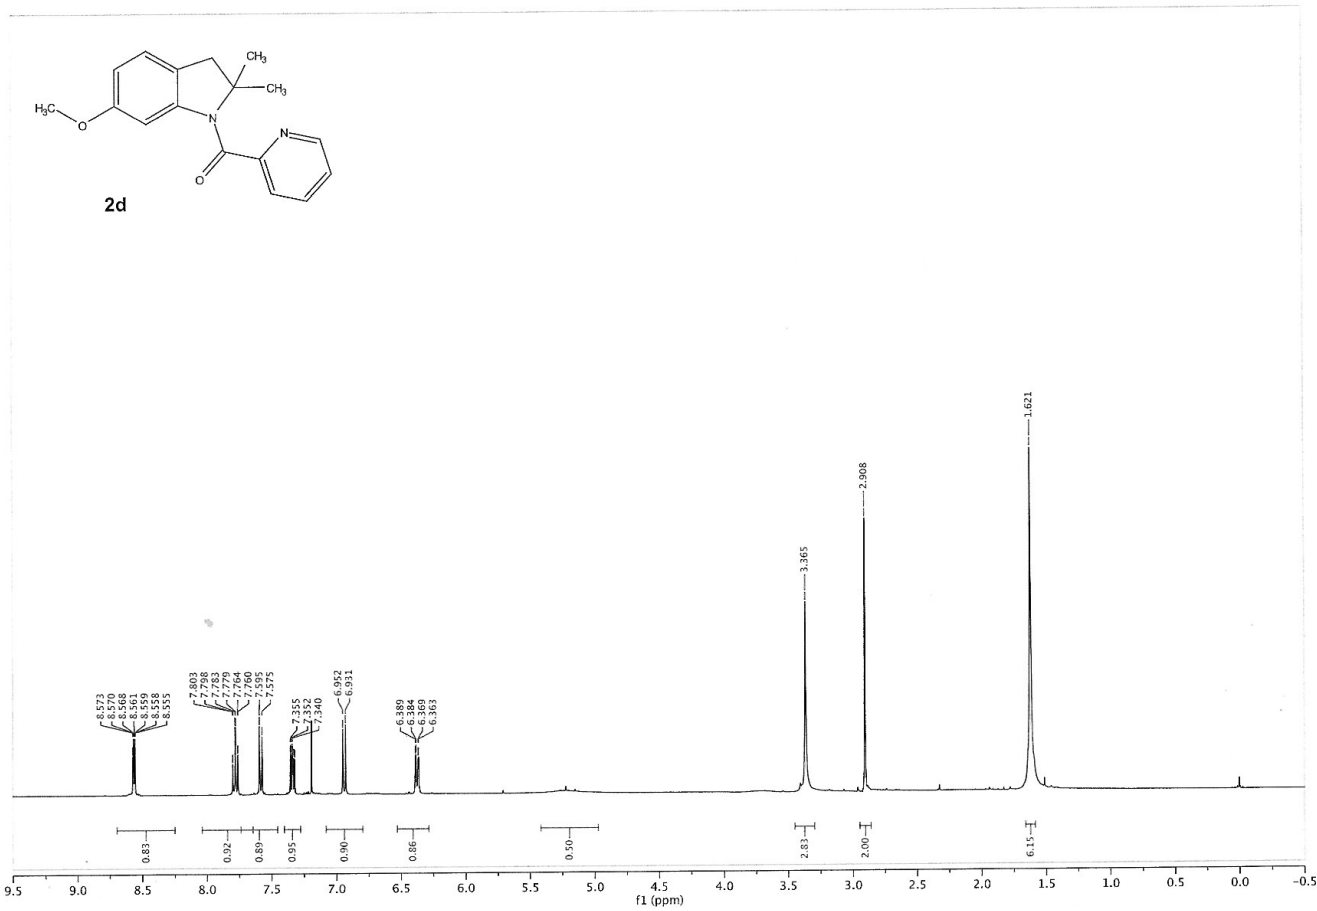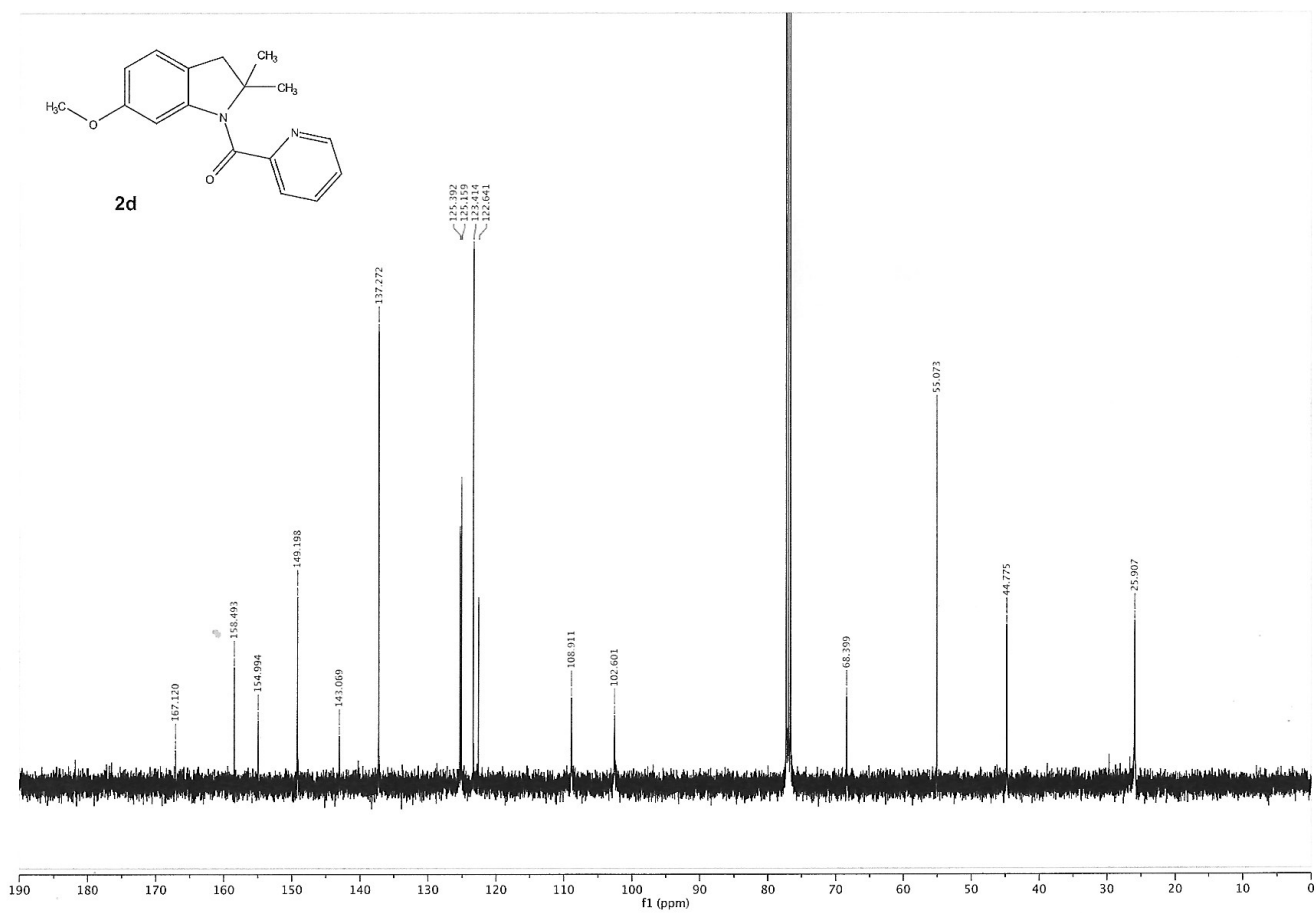

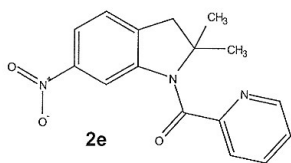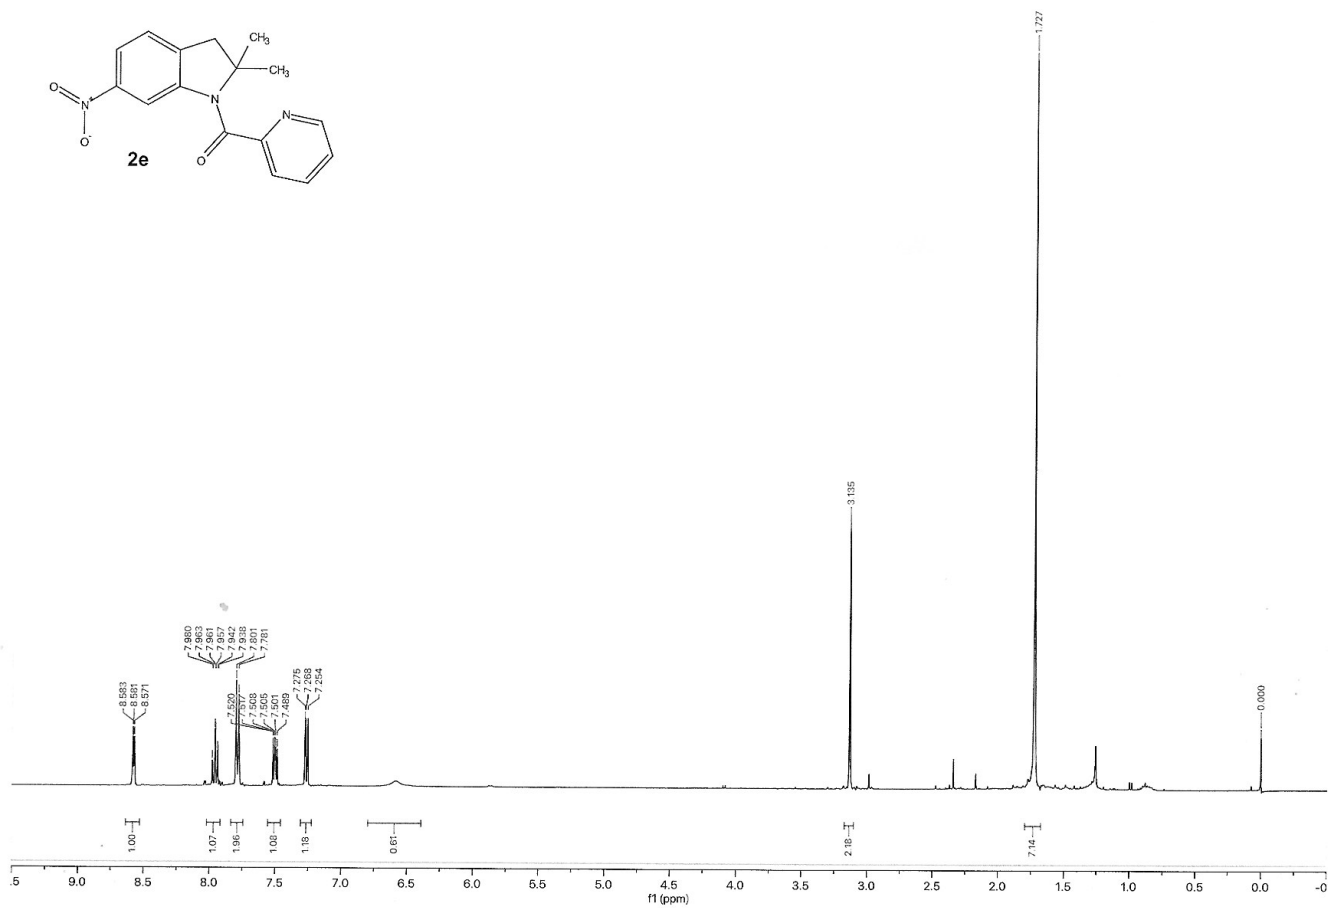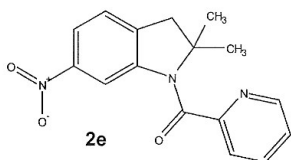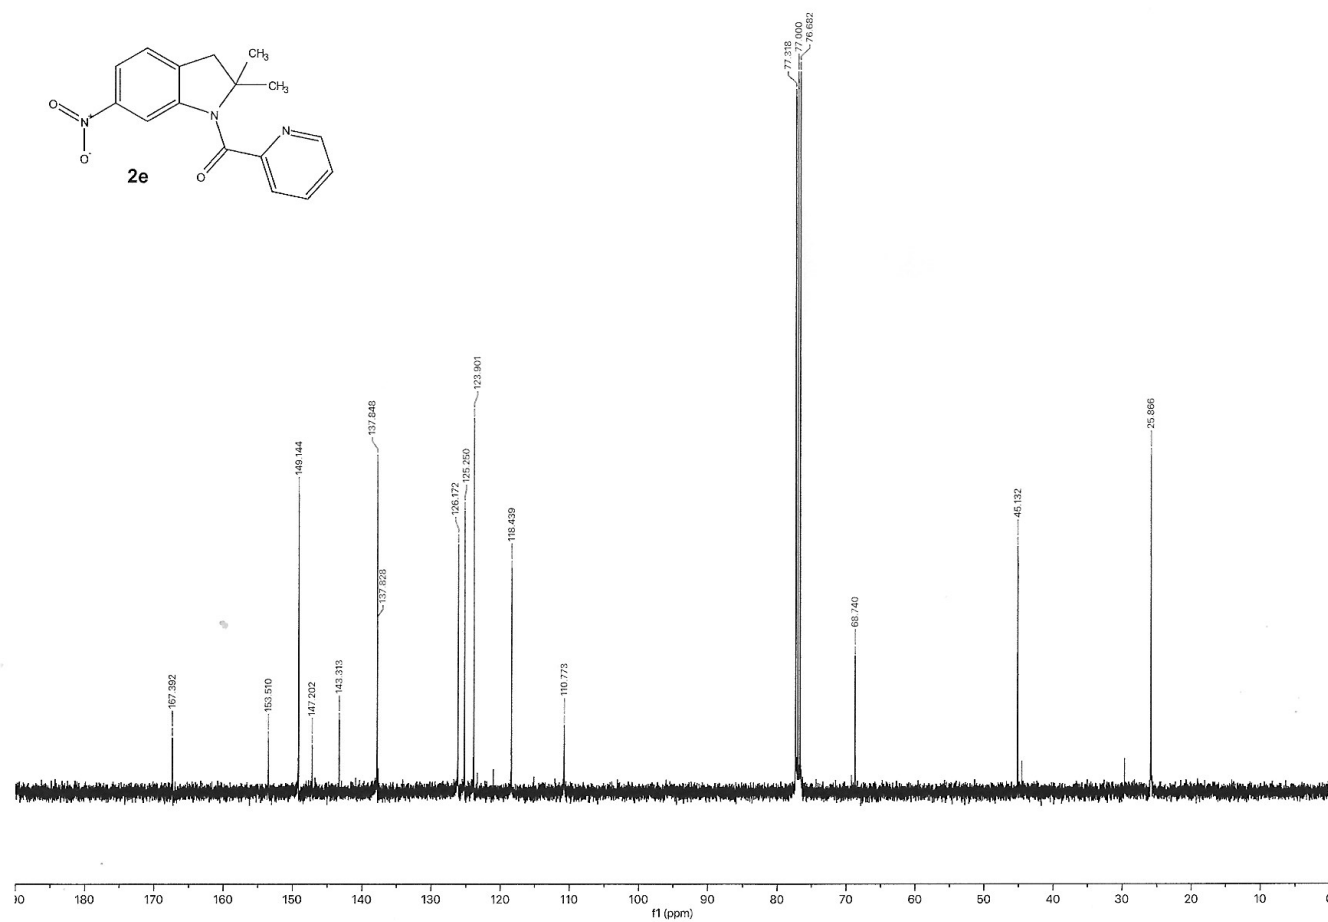

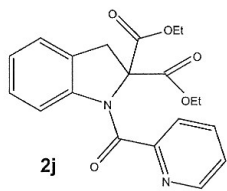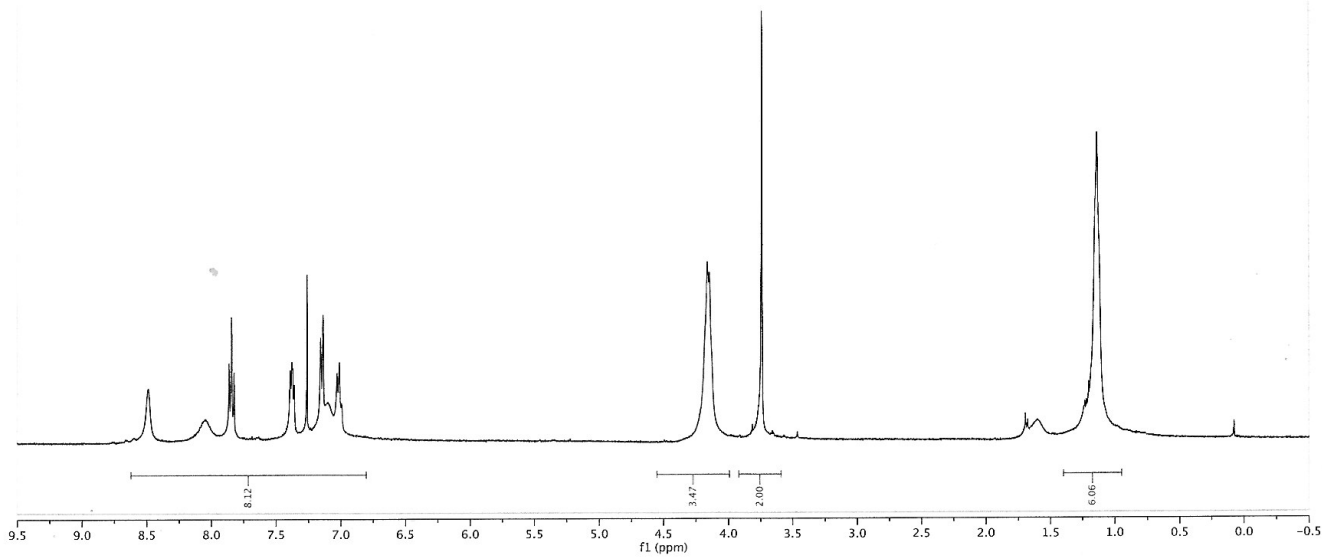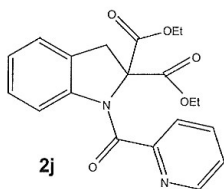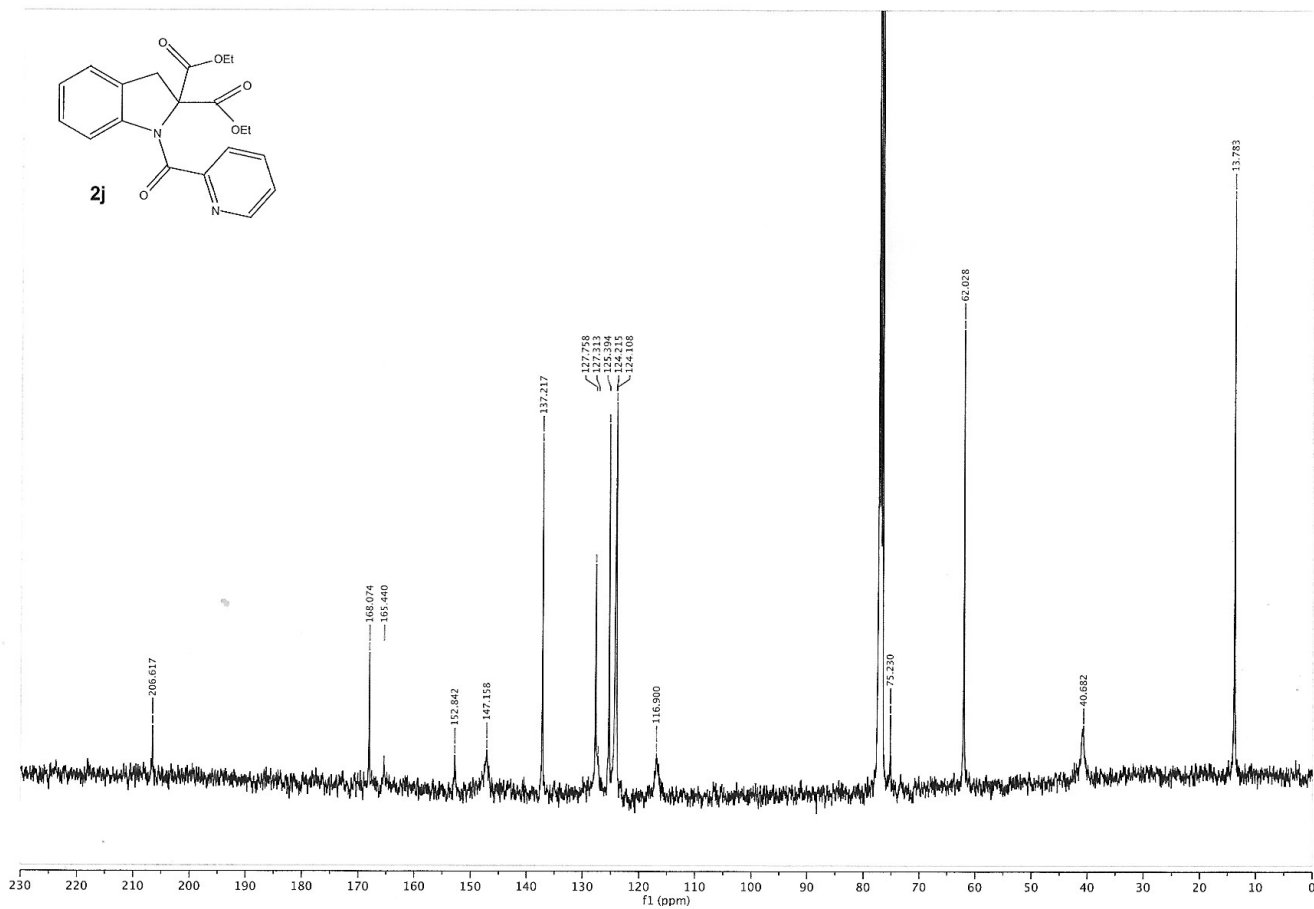

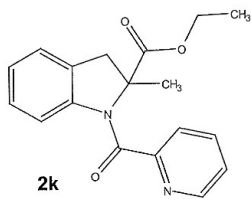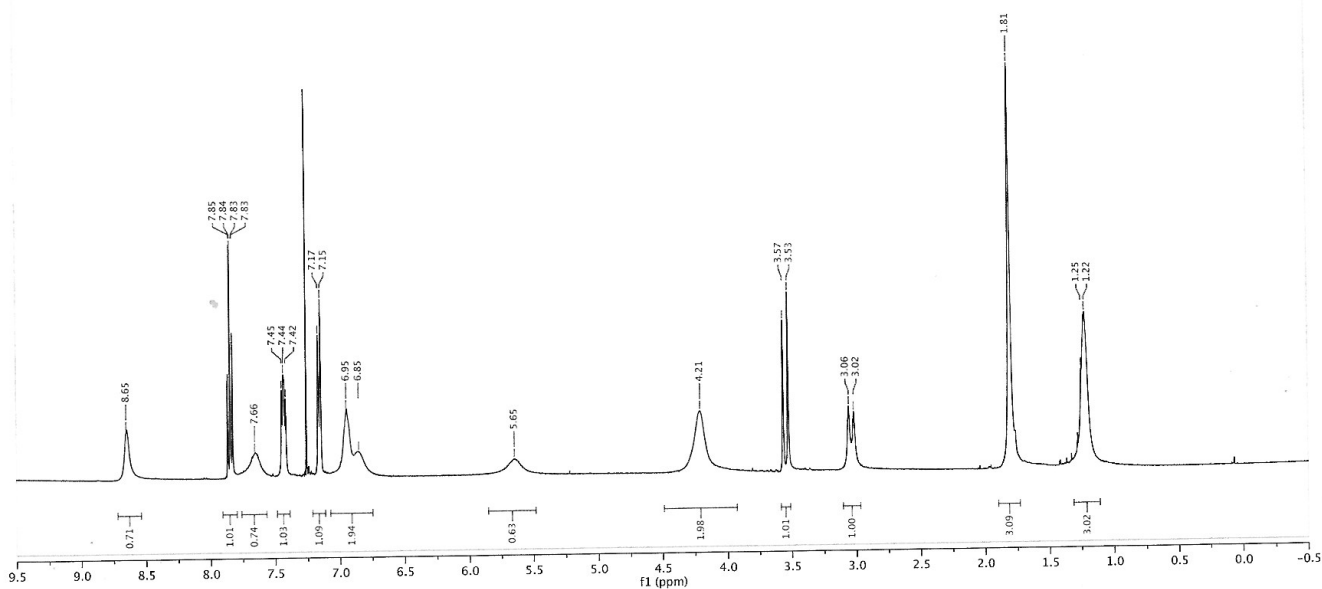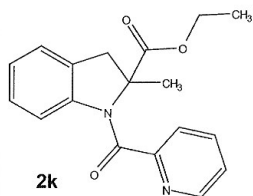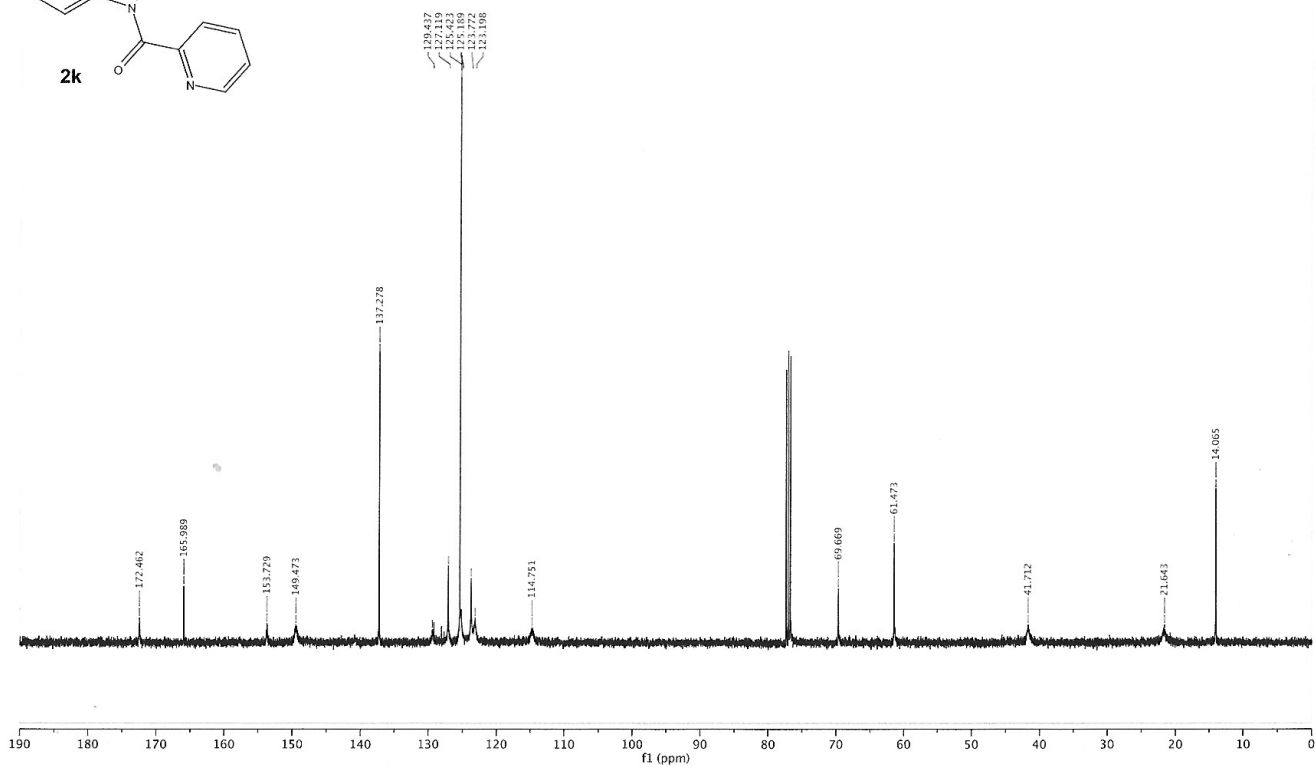



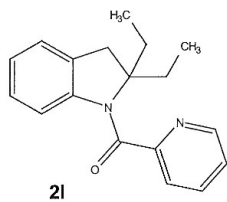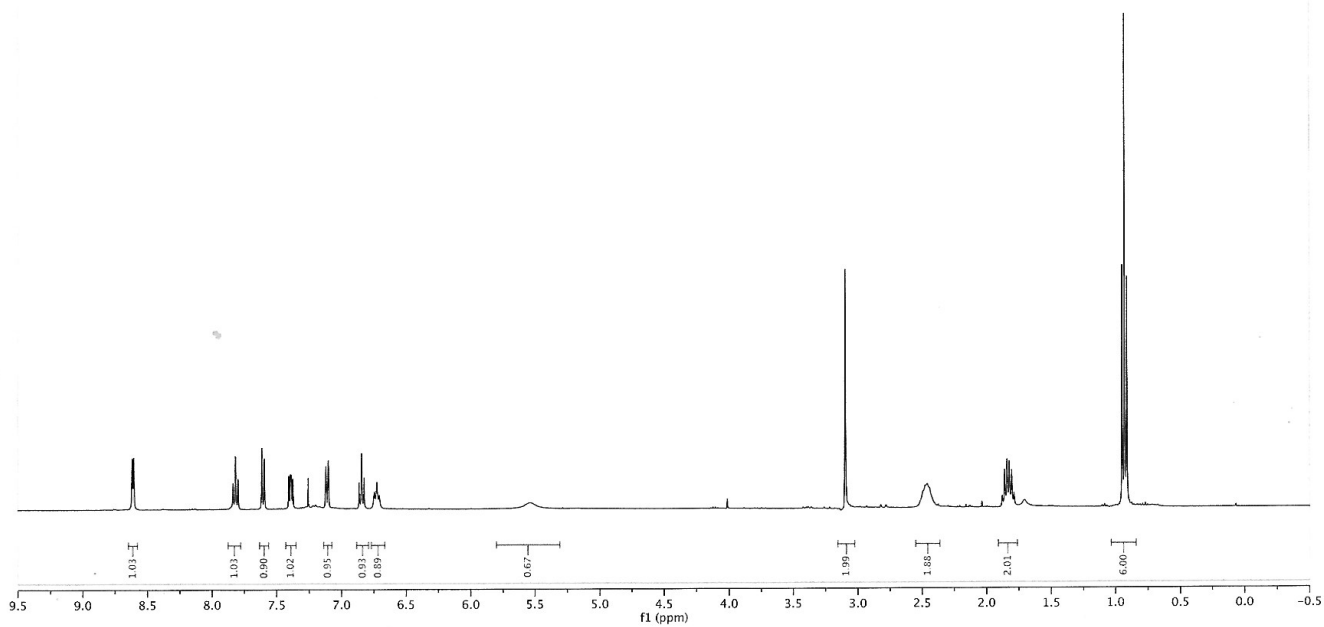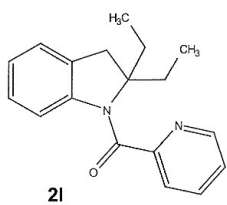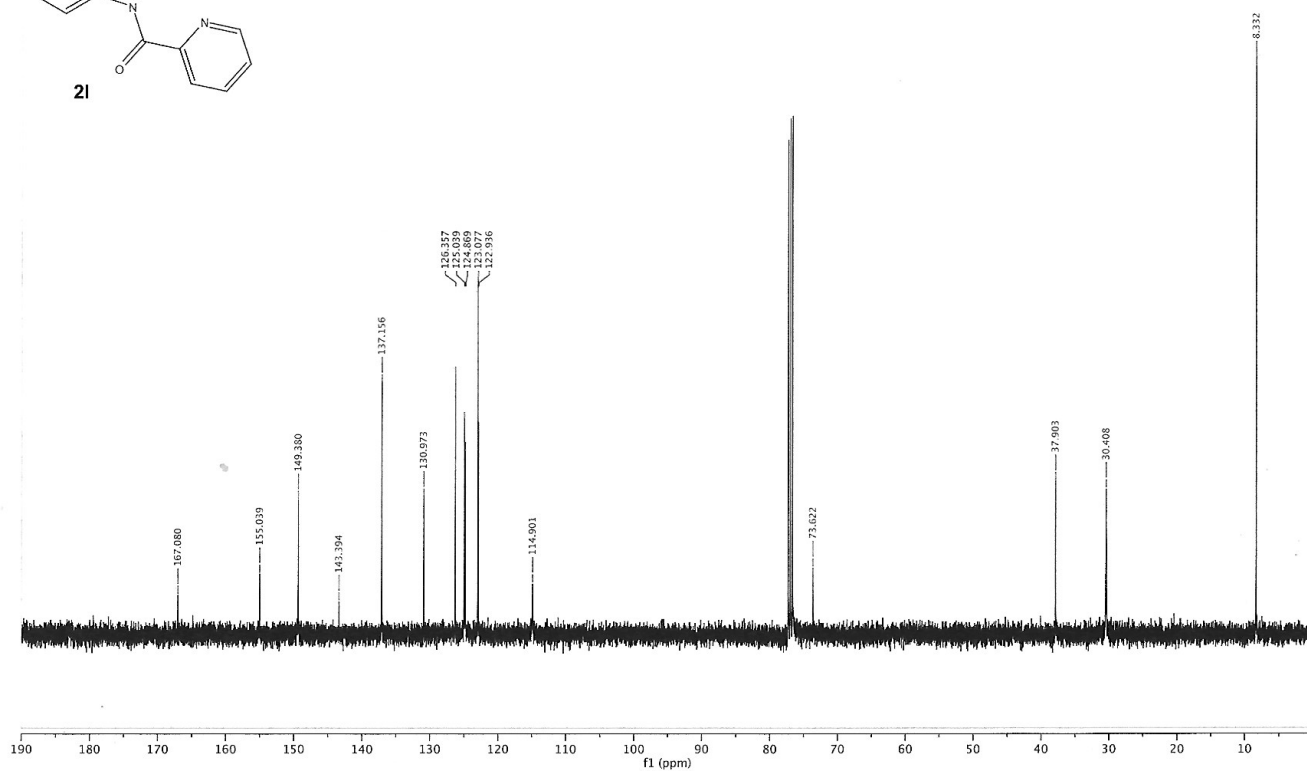

Supplement: c9ra05670j1.pdf [file c9ra05670j1.pdf]
